# Supplementary material for: New nitrogen-rich azo-bridged porphyrin-conjugated microporous networks for high performance of gas capture and storage
Source: Royal Society of Chemistry journal article supplement (doi:10.1039/c6ra04077b), 2016-01-01
Supplement: c6ra04077b1.pdf [file c6ra04077b1.pdf]

Supporting Information

## **New nitrogen-rich azo-bridged porphyrin conjugated microporous networks for high performance of gas capture and storage**

Yanfei Xu,<sup>a,d</sup> Zhi Li,<sup>\*a</sup> Fan Zhang,<sup>b</sup> Xiaodong Zhuang,<sup>\*b</sup> Zheng Zeng,<sup>c</sup> and Jianjun Wei<sup>\*c</sup>

<sup>a</sup> Institute of Nuclear Technology Application, School of Science, East China University of Science and Technology, Shanghai 200237; China

<sup>b</sup> Institute of Advanced Organic Materials, School of Chemistry and Chemical Engineering, Shanghai Jiao Tong University, Shanghai 200240; China

<sup>c</sup> Department of Nanoscience, Joint School of Nanoscience and Nanoengineering, University of North Carolina at Greensboro; USA

<sup>d</sup> Shaoxing University, Shaoxing 312099, Zhengjiang Province, China

**Synthesis of Azo-2**, TNPP (0.3176 g, 0.4 mmol), benzidine (0.1474 g, 0.8 mmol) and KOH (0.22 g, 3.94 mmol) were dissolved in DMF (25 mL). The reaction mixture was heated to 150 °C and stirred for 24 h under a nitrogen atmosphere. The reaction mixture was cooled to room temperature, added with 150 mL of distilled water and stirred for 1 h. Black precipitate was filtered off and washed several times with distilled water, acetone and THF in order to remove any unreacted monomers and KOH. Subsequently, black precipitates were dried at 60 °C under vacuum overnight to yield Azo-2: 0.30g. The rate was 65% with elemental analysis of C, 74.82; H, 9.92; N, 14.01 (%).

**Synthesis of Azo-3**, TNPP (0.3176 g, 0.4 mmol), melamine (0.0673 g, 0.53 mmol) and KOH (0.22 g, 3.94 mmol) were dissolved in DMF (25 mL). The reaction mixture was heated to 150 °C and stirred for 24 h under a nitrogen atmosphere. The reaction mixture was cooled to room temperature, added with 150 mL of distilled water and stirred for 1 h. Black precipitate was filtered off and washed several times with distilled water, acetone and THF in order to remove any unreacted monomers and KOH. Subsequently, black precipitates were dried at 60 °C under vacuum overnight to yield Azo-3: 0.29g. Yield were was 75% with elemental analysis of C, 72.03; H, 4.40; N, 15.49 (%).

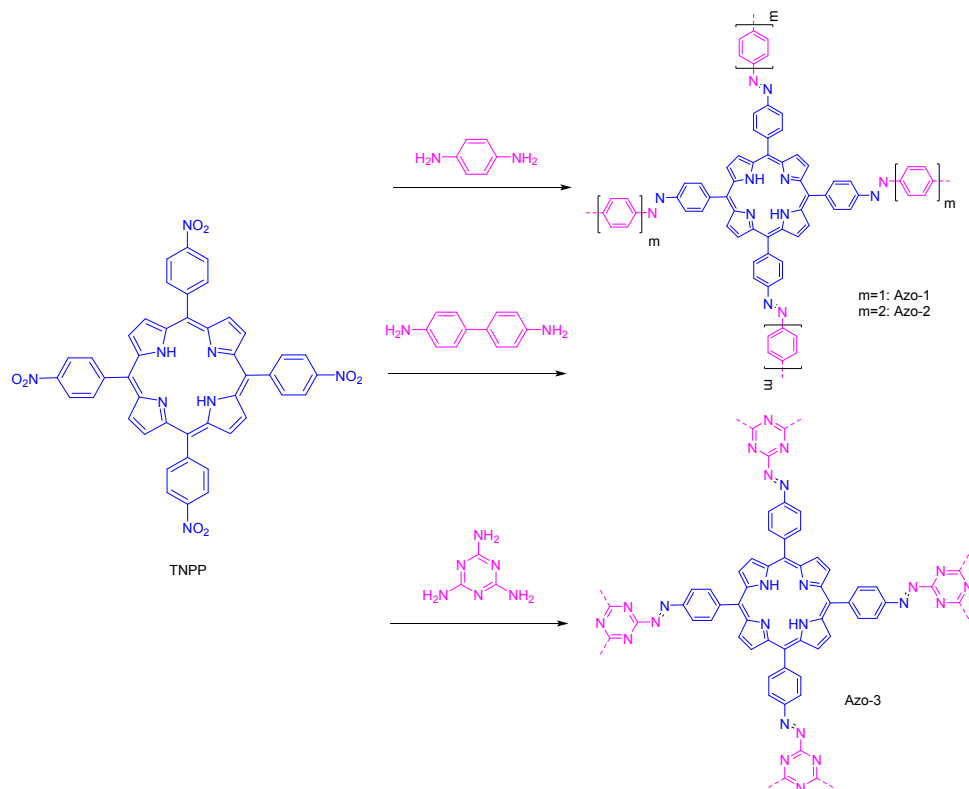

**Scheme 1S.** Synthesis of polymers Azo-1, Azo-2, and Azo-3 under the same condition: TNPP and amino-containing building blocks, KOH, DMF, 150 °C, 24 h.

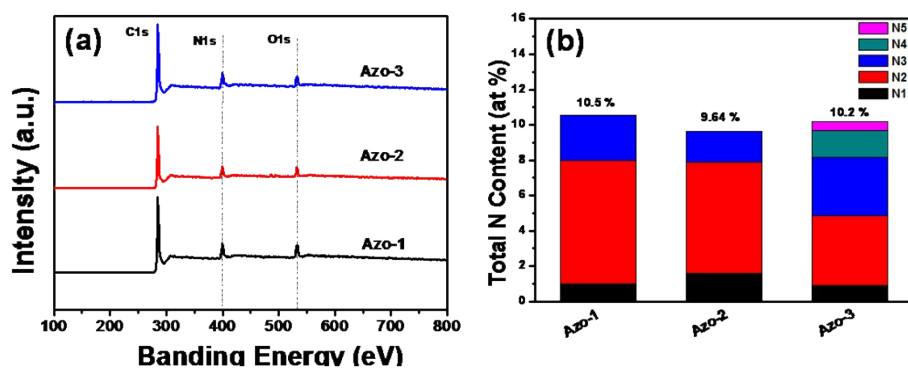

**Fig.S1.** (a) XPS survey spectra, (b) atomic percentages of different nitrogen species for Azos.

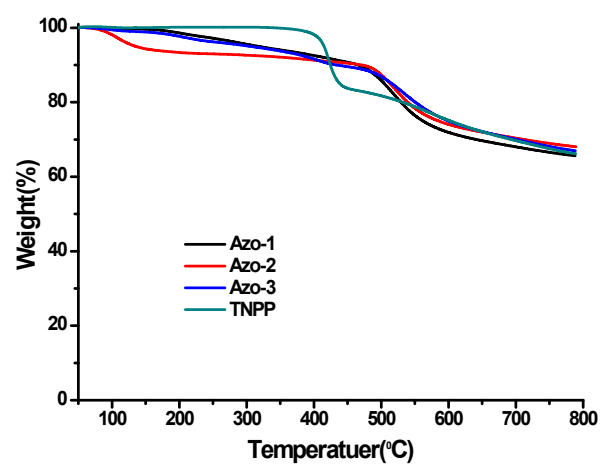

**Fig.S2.** TGA curves of Azo-1, Azo-2 and Azo-3 under  $N_2$  atmosphere up to  $800^\circ C$  at a rate of  $20^\circ Cmin^{-1}$ .

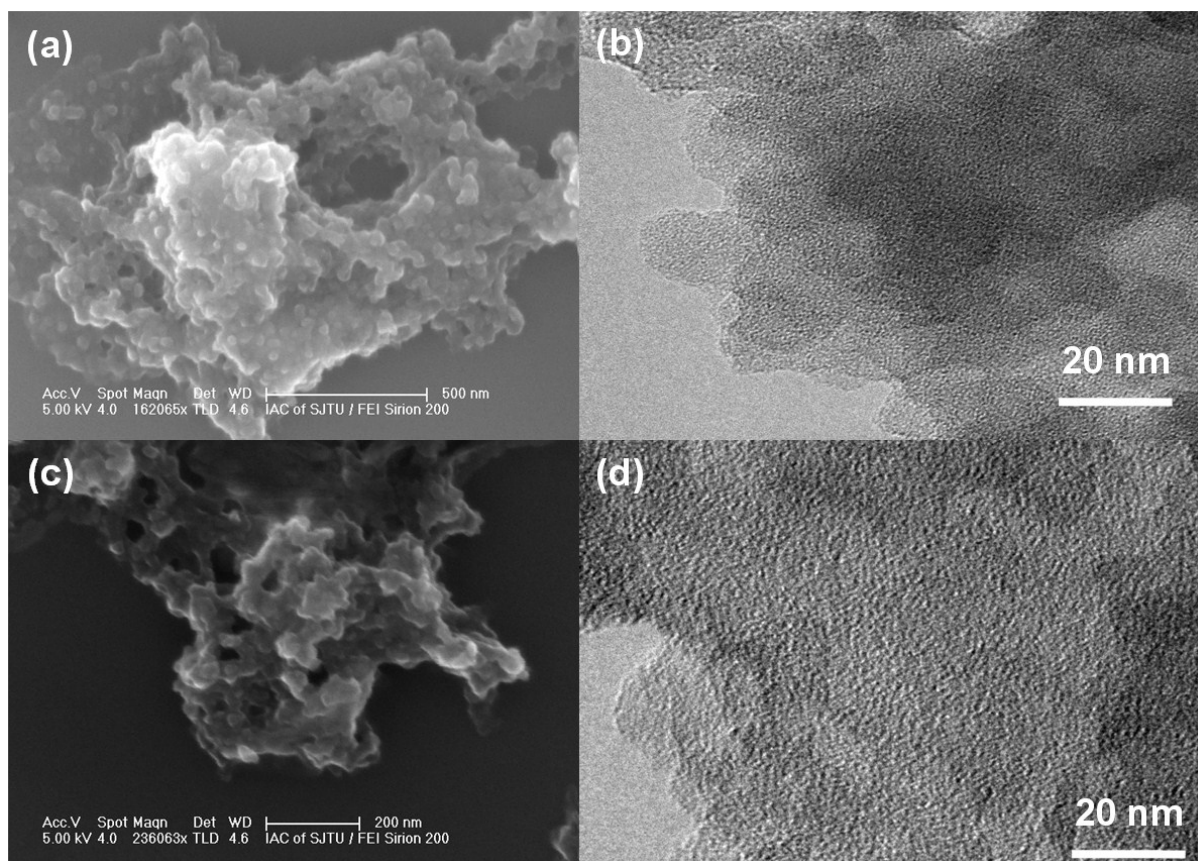

**Fig.S3.** Typical SEM images and TEM images of Azos. ((a) (b) is for Azo-2 and (c) (d) is for Azo-3).

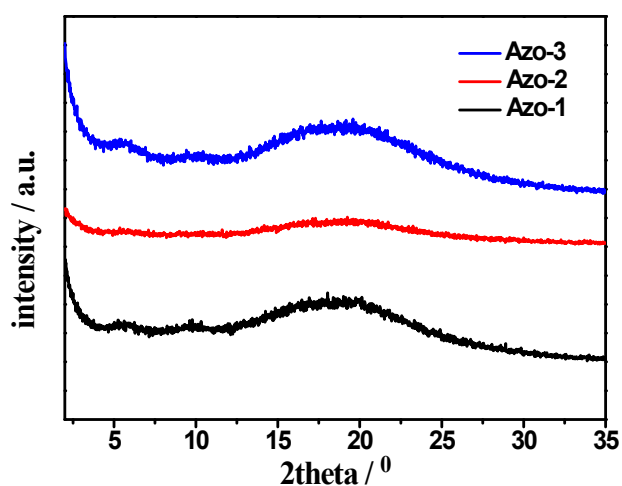

Fig.S4. XRD patterns of Azo-1, Azo-2, and Azo-3.

Table S1. Surface Properties and CO<sub>2</sub> Uptake for reported networks

| Name                                  | S <sub>BET</sub> [m <sup>2</sup> /g] | CO <sub>2</sub> uptake                     |             | References                     |
|---------------------------------------|--------------------------------------|--------------------------------------------|-------------|--------------------------------|
|                                       |                                      | [mmolg <sup>-1</sup> ] <sup>a</sup> (wt %) |             |                                |
|                                       |                                      | 273K                                       | 298K        |                                |
| CTF-0                                 | 687                                  | 1.53(6.30)                                 | -           | PhisanKatekomol <sup>1</sup>   |
| CMP-1                                 | 837                                  | 1.56(6.86)                                 | -           | Robert Dawson <sup>2</sup>     |
| CMP-1-(CH <sub>3</sub> ) <sub>2</sub> | 899                                  | 0.94(4.14)                                 | -           | Robert Dawson <sup>2</sup>     |
| CMP-1-COOH                            | 522                                  | 1.60(7.04)                                 | -           | Robert Dawson <sup>2</sup>     |
| DmaTph                                | 431                                  | 1.65(7.26)                                 | -           | SharathKandambeth <sup>3</sup> |
| PAF-1                                 | 5600                                 | 2.05(9.02)                                 | 1.09(4.80)  | Teng Ben <sup>4</sup>          |
| PAF-3                                 | 2932                                 | 3.48(15.3)                                 | 1.82(8.0)   | Teng Ben <sup>4</sup>          |
| PAF-4                                 | 2246                                 | 2.43(10.7)                                 | 1.16(5.1)   | Teng Ben <sup>4</sup>          |
| COF-1                                 | 750                                  | 2.32(10.21)                                | -           | Hiroyasu Furukawa <sup>5</sup> |
| TPI-1                                 | 809                                  | 2.45(10.78)                                | -           | Mario R. Liebl <sup>6</sup>    |
| azo-CMP-1                             | -                                    | 2.45(10.76)                                | 1.48(6.53)  | Hasmukh A. Patel <sup>7</sup>  |
| azo-CMP-2                             | -                                    | 2.55(11.24)                                | 1.53(6.73)  | Hasmukh A. Patel <sup>7</sup>  |
| azo-CMP-3                             | -                                    | 1.93(8.51)                                 | 1.22(5.36)  | Hasmukh A. Patel <sup>7</sup>  |
| Nerwork-1                             | 3160                                 | -                                          | 1.48(6.54)  | James R. Holst <sup>8</sup>    |
| Nerwork-2                             | 1102                                 | -                                          | 0.91(4.01)  | James R. Holst <sup>8</sup>    |
| Nerwork-3                             | 3180                                 | -                                          | 1.72(7.56)  | James R. Holst <sup>8</sup>    |
| Nerwork-A                             | 4077                                 | 2.65(11.66)                                | 1.45(6.38)  | Robert Dawson <sup>9</sup>     |
| Nerwork-D                             | 1213                                 | 2.42(10.65)                                | 1.33(5.85)  | Robert Dawson <sup>9</sup>     |
| Nerwork-E                             | 1470                                 | 2.95(12.98)                                | 1.77(7.79)  | Robert Dawson <sup>9</sup>     |
| Nerwork-F                             | 653                                  | 1.80(7.92)                                 | 1.08(4.75)  | Robert Dawson <sup>9</sup>     |
| Nerwork-G                             | 1056                                 | 2.15(9.46)                                 | 1.25(5.5)   | Robert Dawson <sup>9</sup>     |
| N-heterocyclic<br>carbenes            | 475                                  | -                                          | 2.17 (9.55) | Coskun <sup>10</sup>           |

|            |         |             |             |                       |
|------------|---------|-------------|-------------|-----------------------|
| Porphyrin1 | 1510    | 3.17 (13.9) | -           | Liu, X. <sup>11</sup> |
| Porphyrin2 | 557     | 2.76 (12.1) | 1.42 (7.9)  | Neti <sup>12</sup>    |
| Azo-POF1   | 712     | 2.97 (13.1) | 1.88 (8.31) | Lu <sup>13</sup>      |
| Azo-anline | 412-801 | 4.46 (19.7) | 2.94 (13.0) | Arab <sup>14</sup>    |
| Azo-1      | 571     | 2.14(9.42)  | 1.62 (7.11) | Our work              |
| Azo-2      | 675     | 3.98(17.52) | 2.04(8.97)  | Our work              |
| Azo-3      | 520     | 2.87(12.63) | 1.50(6.60)  | Our work              |

<sup>a</sup> CO<sub>2</sub> uptake measured at 273 K , 298 K and 1 bar.

**Table S2. Surface properties and H<sub>2</sub> uptake for reported networks**

| Name      | S <sub>BET</sub> [m <sup>2</sup> /g] | H <sub>2</sub> uptake<br>[wt %] <sup>a</sup> | References                   |
|-----------|--------------------------------------|----------------------------------------------|------------------------------|
| CMP-3B    | 325                                  | 0.53                                         | Jia-Xing Jiang <sup>15</sup> |
| Network-5 | 1470                                 | 1.00                                         | James R. Holst <sup>8</sup>  |
| Network-1 | 682                                  | 0.81                                         | Robert Dawson <sup>16</sup>  |
| Azo-1     | 571                                  | 0.86                                         | Our work                     |
| Azo-2     | 675                                  | 1.15                                         | Our work                     |
| Azo-3     | 520                                  | 0.97                                         | Our work                     |

<sup>a</sup> H<sub>2</sub> uptake measured at 77 K and 1 bar.

## References

1. P. Katekomol, J. Roeser, M. Bojdys, J. Weber and A. Thomas, *Chemistry of Materials*, 2013, **25**, 1542-1548.
2. R. Dawson, D. J. Adams and A. I. Cooper, *Chemical Science*, 2011, **2**, 1173-1177.
3. S. Kandambeth, D. B. Shinde, M. K. Panda, B. Lukose, T. Heine and R. Banerjee, *Angewandte Chemie*, 2013.
4. T. Ben, C. Pei, D. Zhang, J. Xu, F. Deng, X. Jing and S. Qiu, *Energy & Environmental Science*, 2011, **4**, 3991.
5. H. Furukawa and O. M. Yaghi, *Journal of the American Chemical Society*, 2009, **131**, 8875-8883.
6. M. R. Liebl and J. Senker, *Chemistry of Materials*, 2013, **25**, 970-980.
7. H. A. Patel, S. H. Je, J. Park, D. P. Chen, Y. Jung, C. T. Yavuz and A. Coskun, *Nat Commun*, 2013, **4**, 1357.
8. J. R. Holst, E. Stöckel, D. J. Adams and A. I. Cooper, *Macromolecules*, 2010, **43**, 8531-8538.
9. R. Dawson, E. Stöckel, J. R. Holst, D. J. Adams and A. I. Cooper, *Energy & Environmental Science*, 2011, **4**, 4239-4245.
10. S. N. Talapaneni, O. Buyukcakir, S. H. Je, S. Srinivasan, Y. Seo, K. Polychronopoulou and A. Coskun, *Chemistry of Materials*, 2015, **27**, 6818-6826.
11. X. Liu, H. Li, Y. Zhang, B. Xu, S. A. H. Xia and Y. Mu, *Polymer Chemistry*, 2013, **4**, 2445-2448.
12. V. S. P. K. Neti, J. Wang, S. Deng and L. Echegoyen, *RSC Advances*, 2015, **5**, 10960-10963.
13. J. Lu and J. Zhang, *Journal of Materials Chemistry A*, 2014, **2**, 13831-13834.
14. P. Arab, E. Parrish, T. Islamoglu and H. M. El-Kaderi, *Journal of Materials Chemistry A*, 2015, **3**, 20586-20594.
15. J.-X. Jiang, F. Su, A. Trewin, C. D. Wood, H. Niu, J. T. Jones, Y. Z. Khimyak and A. I. Cooper,

*Journal of the American Chemical Society*, 2008, **130**, 7710-7720.

16. R. Dawson, A. Laybourn, R. Clowes, Y. Z. Khimyak, D. J. Adams and A. I. Cooper, *Macromolecules*, 2009, **42**, 8809-8816.
